# Supplementary material
Source: PubMed Central journal article supplement (PMC2782862)
Supplement: NIHMS114159-supplement-Suppfig.pdf [file NIHMS114159-supplement-Suppfig.pdf]

a

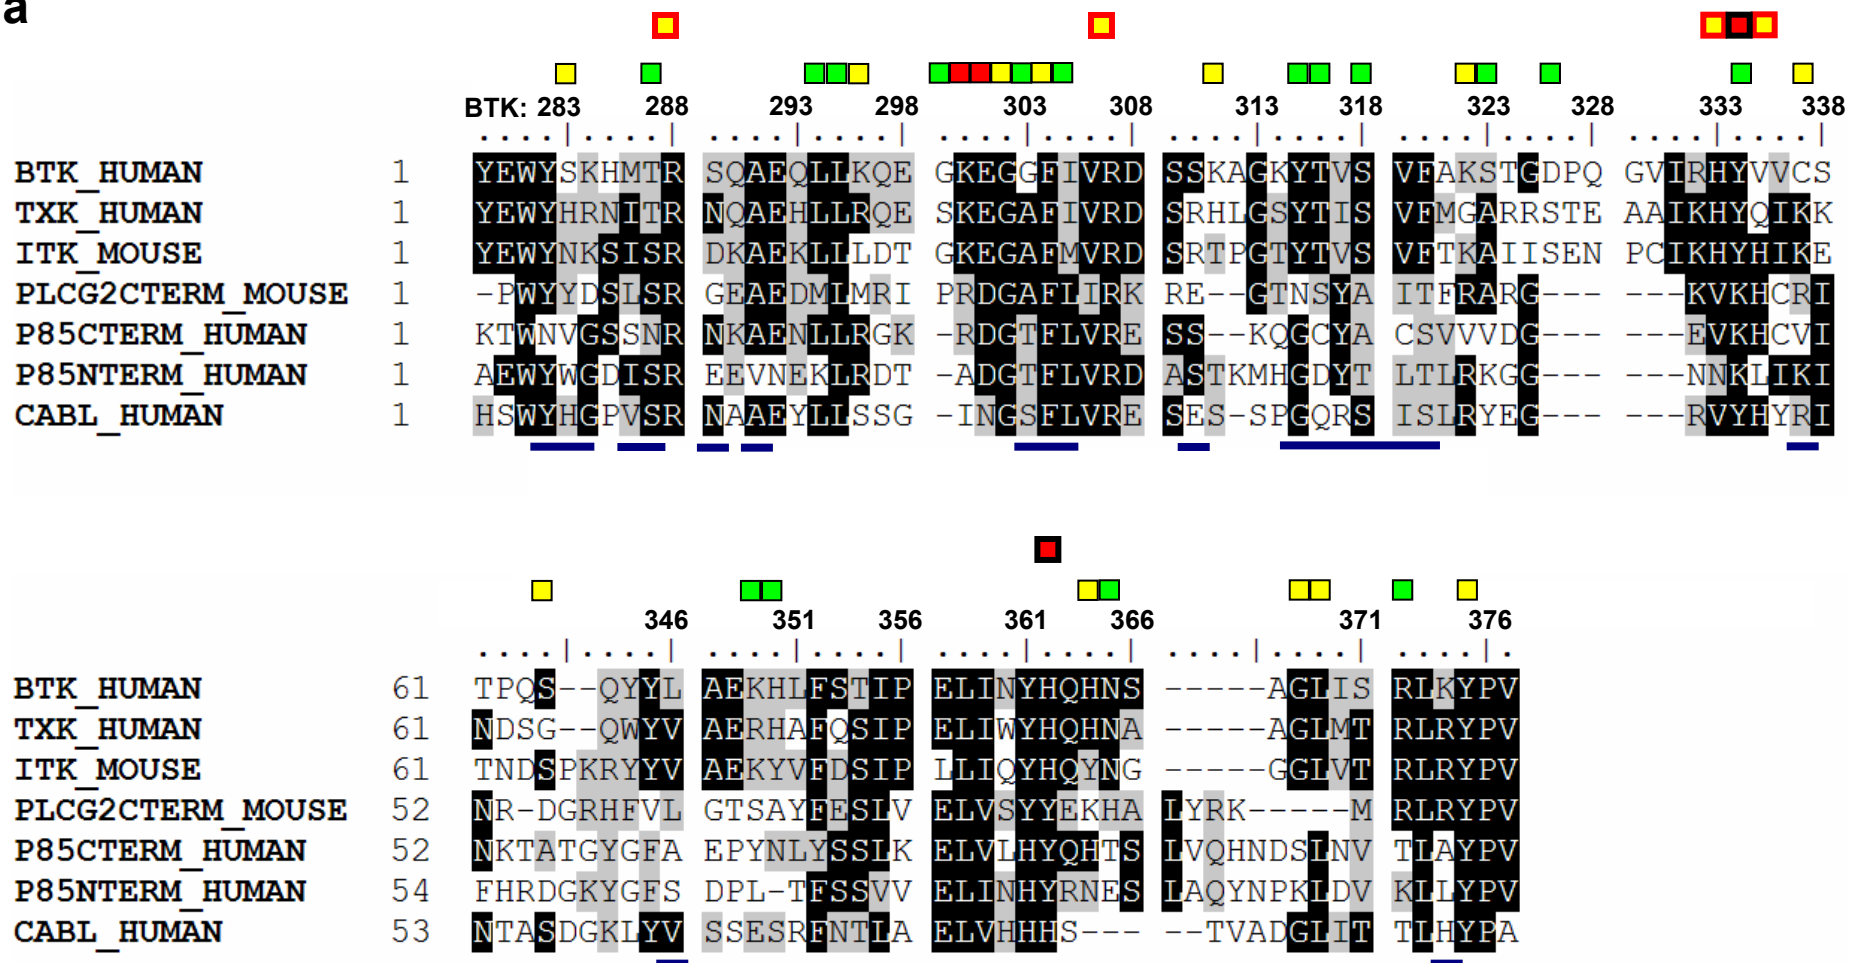

|  |       |                      |  |             |                         |  |                                                                                                                                    |
|--|-------|----------------------|--|-------------|-------------------------|--|------------------------------------------------------------------------------------------------------------------------------------|
|  | 36-45 | GDDA-BLAST           |  | P-Tyr       | Coordinating Residues   |  | Positions in c-Abl which (+ lipids) show NMR structural perturbations >average + 1 SD (Tokonzaba E et al. Chem Biol Drug Des 2006) |
|  | 26-35 | Positional score     |  | Hydrophobic | Phosphotyrosine-binding |  |                                                                                                                                    |
|  | 20-25 | (Mutational Display) |  |             |                         |  |                                                                                                                                    |

Supplemental Figure 1

b

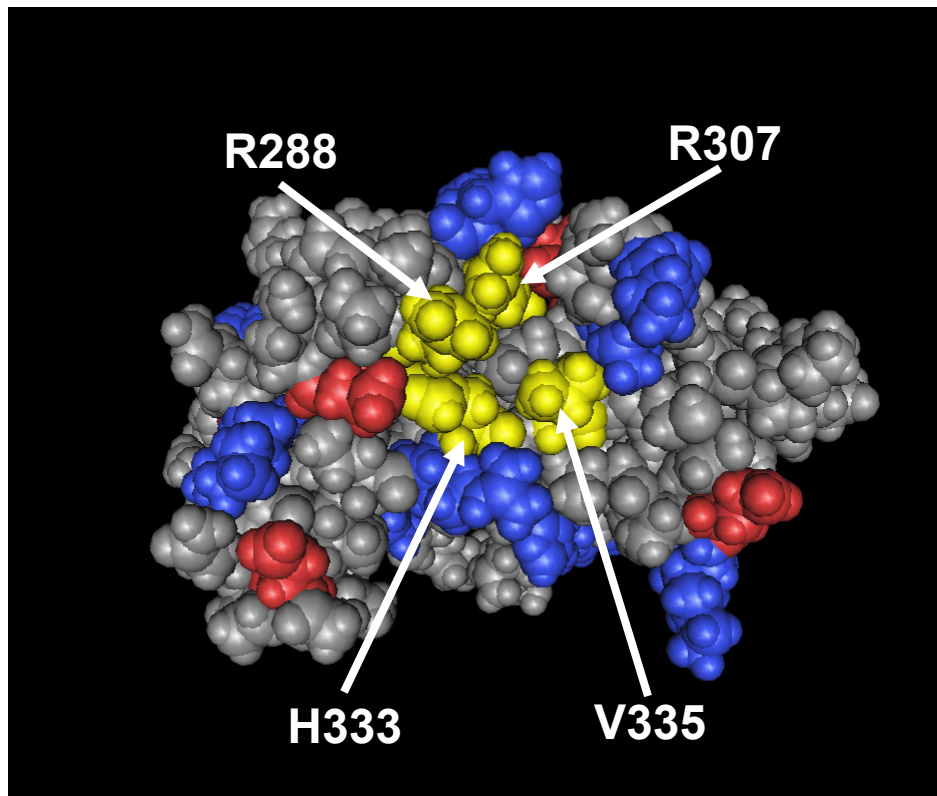

SF 1

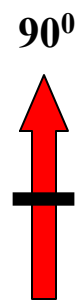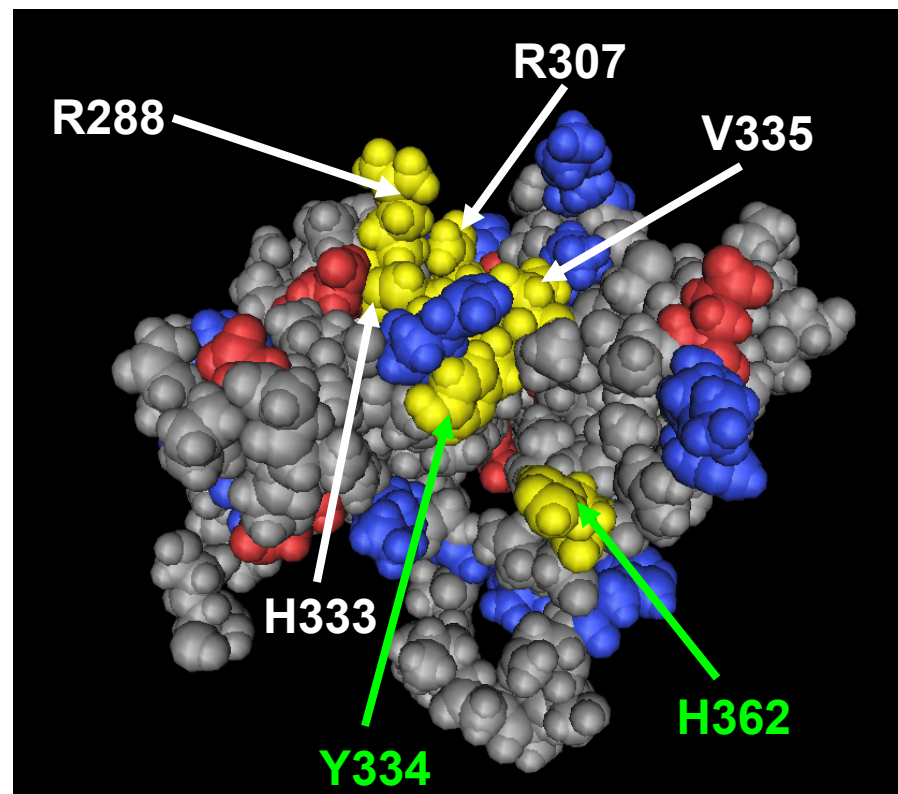

**c**

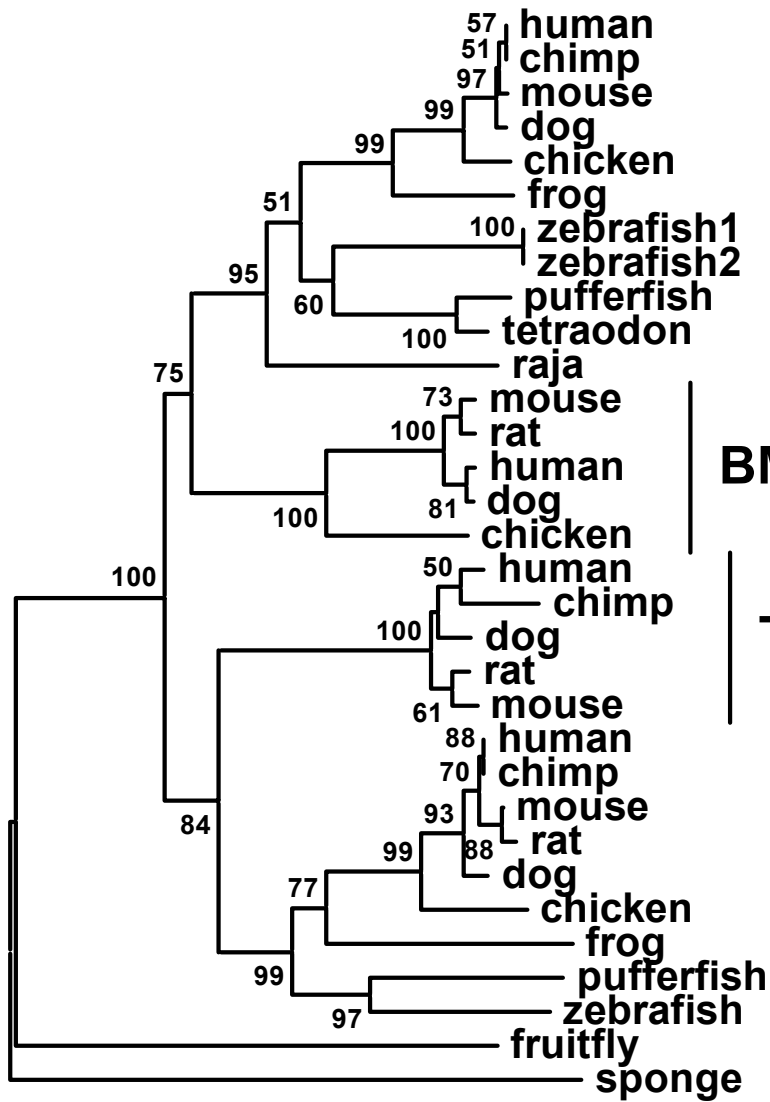

0.05

**NJ tree  
PH domain  
92 sites used**

SF 1

**BTK**

**BMX**

**TEC**

**ITK**

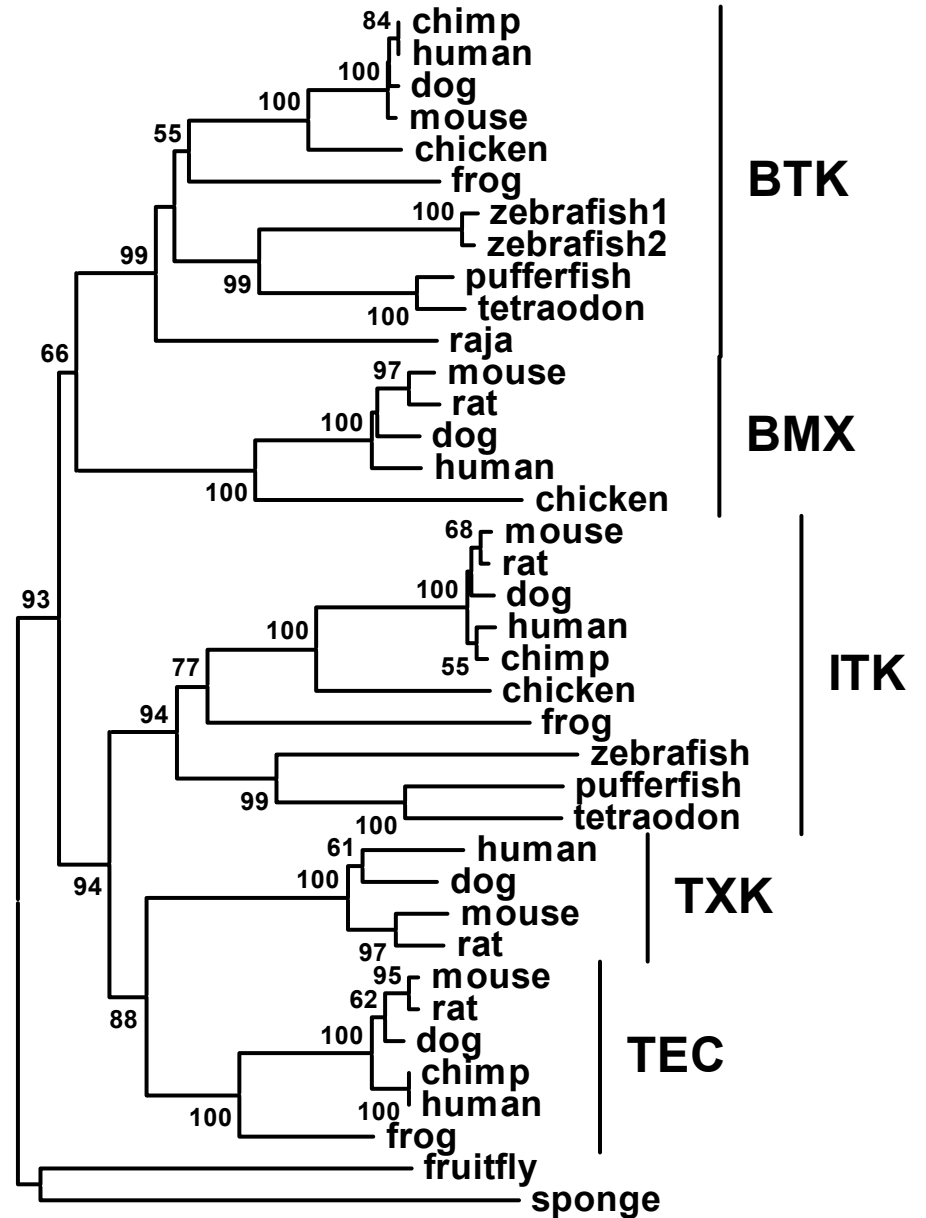

0.05

**NJ tree  
SH1 domain  
227 sites used**

**BTK**

**BMX**

**ITK**

**TXK**

**TEC**

**Supplemental Figure 1:** (a) Multiple sequence alignment (MSA) of 7 structurally resolved SH2 domains which bind lipid. This MSA is annotated for the P-Tyrosine and Hydrophobic residues and those positions identified by GDDA-BLAST (in main text Figure 2a). In addition, positions in c-Abl which move in response to lipid-binding are plotted. (b) Structure of BTK SH2 annotated for the 4 P-Tyrosine (White) and 2 Hydrophobic (green) positions (PDB: 2GE9). (c) *Left:* Neighbor-joining tree of the PH domain in TEC, TXK, BMX, and BTK sequences from various taxa. This tree is rooted by the fruitfly and sponge TEC sequences. TXK does not have a PH domain and therefore has been excluded from these measures. *Right:* as above except the Neighbor-joining tree was constructed with only the SH1 domain (Kinase). These results are not due to the reduced number of sites utilized since trees generated from PH domain only (92 sites) or SH1 domain only (227 sites) retain the full-length topology and have significant support. Taken together, this suggests that the SH3-SH2 module is evolving more rapidly than the other domains in the protein. The clades have been colored with respect to their lipid specificity *in vitro*.
